# Supplementary material for: High-performance piezoelectric energy harvesting of vertically aligned Pb(Zr,Ti)O3 nanorod arrays
Source: Royal Society of Chemistry journal article supplement (doi:10.1039/c7ra13506h), 2018-01-01
Supplement: c7ra13506h1.pdf [file c7ra13506h1.pdf]

### Supplementary Information

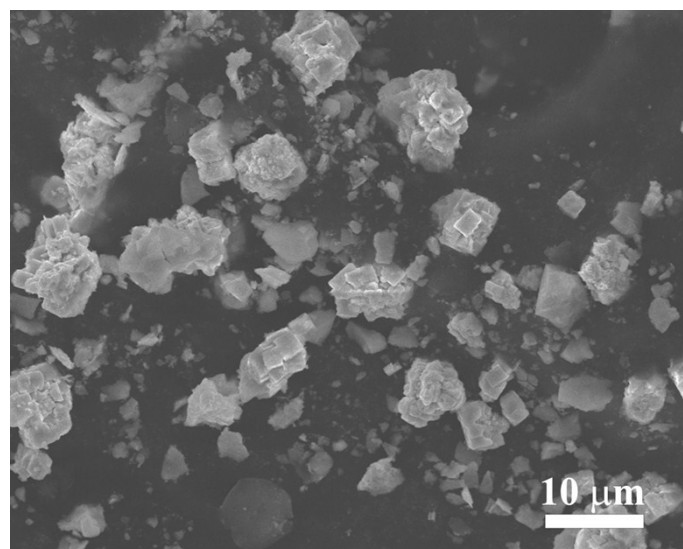

**Figure 1S.** The SEM image of the samples which were not attached on the substrate after the hydrothermal reaction with PVA of 0.10 g.

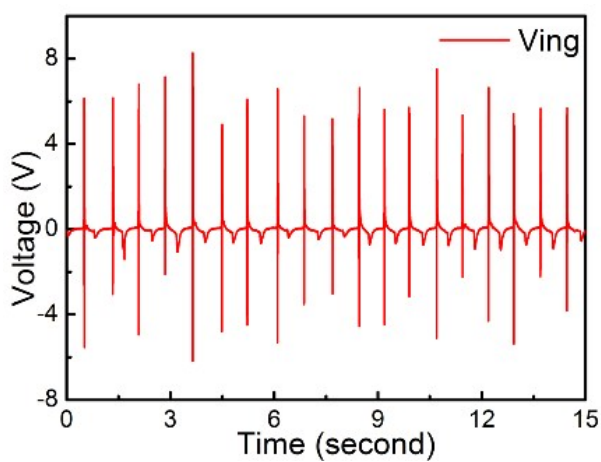

**Figure 2S.** The open-circuit voltage generated by the PZT NRAs when the device was knocked by human fingers.

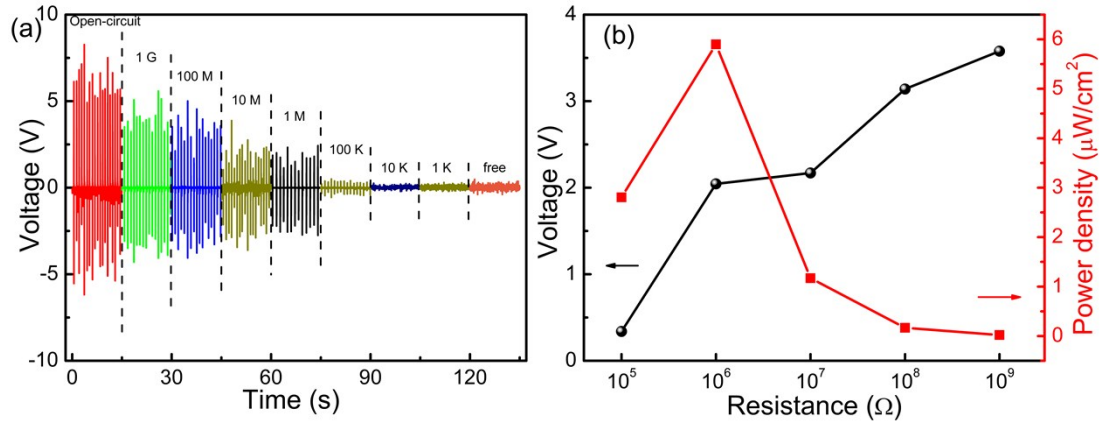

**Figure 3S.** The voltage generated by the PZT NRAs to the external electrical load with different resistance when the device was knocked by human fingers. (a) The voltage signal; (b) The variation of output voltage and average power density with the load resistance.
